# Supplementary material for: Effects of Copper Exposure on Oxidative Stress, Apoptosis, Endoplasmic Reticulum Stress, Autophagy and Immune Response in Different Tissues of Chinese Mitten Crab (Eriocheir sinensis)
Source: MDPI journal article supplement (doi:10.3390/antiox11102029), 2022-10-14
Supplement: s1 [file s1]

**Table S1. Specific primer sequences for qPCR in the study**

| Type                                       | Gene             | Primer sequence (5'-3')                             | Genbank number                  |
|--------------------------------------------|------------------|-----------------------------------------------------|---------------------------------|
| apoptosis-related genes                    | <i>caspase-3</i> | F: GAGCCACGGCACGAACACC<br>R: AGGCTGGGGCACTGCTCATC   | MH183147.1                      |
|                                            | <i>caspase-8</i> | F: TGGAGCGTCATGGTTCAGAC<br>R: CAGACAAGCCACCACTGCTA  | AKS36884.1                      |
|                                            | <i>bax</i>       | F: TGCTGTTGCCCTCCACTTACC<br>R: ATGAGGGGTCTCGACTGGAA | Sequence No.1 from our RNA-seq  |
|                                            | <i>bcl-2</i>     | F: CATCATCTCCCTCTTCGCGG<br>R: CAGTCCCATCACGTGATCA   | Sequence No.2 from our RNA-seq  |
|                                            | <i>p53</i>       | F: TCGACATGGAAGGAAGCAC<br>R: CTGACTTCAAACGGCACAGC   | JQ613218.1                      |
|                                            | <i>cytc1</i>     | F: GGCCAAGGATGTGTCACTGT<br>R: AGTACGGACCACTTGTGTCG  | Sequence No.3 from our RNA-seq  |
| MAPK pathway-related genes                 |                  | F: CGCGAGTTGCAGATCCAGAA                             |                                 |
|                                            | <i>erk</i>       | R: CAAGGGGCGATTGGACAACA                             | GU002542.1                      |
|                                            | <i>jnk</i>       | F: ACCTCCTGTCTCGCATGTTG<br>R: ACAGTGTGTTCCCGGTCATC  | KC900087                        |
|                                            | <i>p38</i>       | F: TACGGGCAAGTCTGCTCGGC<br>R: AAGGTGGTGGAGGGCGTGAAG | KF582665.1                      |
| endoplasmic reticulum stress-related genes |                  | F: CCCGCACCTACAACTCCAT<br>R: CTGCAATGCGGTTCTTAGC    | Sequence No.4 from our RNA-seq  |
|                                            | <i>ef2a</i>      | F: GCTGACAGTGTAACCACCCT<br>R: TGTGGAGTCCCCTTGATGT   | Sequence No.5 from our RNA-seq  |
|                                            | <i>atf4</i>      | F: ATTCCAACCTTGTCCTGCC<br>R: GTCTTCAGGGTAGACGTGCC   | Sequence No.6 from our RNA-seq  |
|                                            | <i>atf6</i>      | F: CAACCTTGGACCTTGTCGG<br>R: CTGCGTCATCCCTTGACCAC   | Sequence No.7 from our RNA-seq  |
|                                            | <i>ire1</i>      | F: TAGTTTTGTGGTCCTGCCCC<br>R: GGACTTGGTGATGGCATGGA  | Sequence No.8 from our RNA-seq  |
|                                            | <i>grp78</i>     | F: CCTTCTATGCCACCAAGCGA<br>R: CTTGCCATCGTCGGTCTGTA  | KC493626.1                      |
| autophagy-related genes                    | <i>atg7</i>      | F: TCCGACTTCATCCGAAAATACC<br>R: GCACTCAACCCCAAGCCTG | MT543027.1                      |
|                                            | <i>tfel</i>      | F: CCAACAACAGTGTGCCTGAC<br>R: TGAACCTTCGTCTTCGCTCA  | Sequence No.9 from our RNA-seq  |
|                                            | <i>p62</i>       | F: ACAGACGCCAAGTACCAAGG<br>R: AGGCTCACTCGTCTCCTGAT  | Sequence No.10 from our RNA-seq |
|                                            | <i>beclin</i>    | F: GCCCATATACTGTGGCGAGG                             | MH173046.1                      |

|                                               |               |                           |                                 |
|-----------------------------------------------|---------------|---------------------------|---------------------------------|
|                                               |               | R: CCAGGTCAAAGAGCCCAGTT   |                                 |
|                                               | <i>ampkβ</i>  | F: CAATCGTTGACCTCCCAGAA   | MK676045.1                      |
|                                               |               | R: ACTTCCCTTTCTTCCCAGAG   |                                 |
|                                               | <i>lc3c</i>   | F: CACGTTGCCTATCCTCGACA   | Sequence No.11 from our RNA-seq |
|                                               |               | R: GTCATCGTCCCTACACTCGC   |                                 |
|                                               | <i>lc3a</i>   | F: ACGTCACGATGGGAGAACTG   | Sequence No.12 from our RNA-seq |
|                                               |               | R: GTGGTGGTGCTCGTAAACCT   |                                 |
|                                               | <i>lamp</i>   | F: TACACTGCACTGCCGACAAC   | Sequence No.13 from our RNA-seq |
|                                               |               | R: TATGCTCCCGACCTTTTGCG   |                                 |
| immune response-<br>related genes             | <i>toll2</i>  | F: GCATACCAGGACGACGAACA   | KC011816.1                      |
|                                               |               | R: TGAGCGAGGAGAGCTTGTTG   |                                 |
|                                               | <i>myd88</i>  | F: ACAAGAGTCAAACCGGGGAC   | KM433864.1                      |
|                                               |               | R: AGAACTGGTGGTGCTCATGG   |                                 |
|                                               | <i>relish</i> | F: TCAGGATTCGGTGGCAACTC   | GQ871279.1                      |
|                                               |               | R: ATCTGCACTTGGACCGATGG   |                                 |
|                                               | <i>il-16</i>  | F: TGACATTGGTCGCTCGTCTC   | AWM96383.1                      |
|                                               |               | R: CTTGAGATGCGAGGGAGGTC   |                                 |
|                                               | <i>litaf</i>  | F: ATCAGCTCCCCACCCATATG   | KF892539.1                      |
|                                               |               | R: GTTGTGGAGCAGCACCTTG    |                                 |
|                                               | <i>akirin</i> | F: CAAACCGCTCTTCACCTTCAG  | KC011818.1                      |
|                                               |               | R: AAGGGCTGTTGGGAGAGTC    |                                 |
|                                               | <i>pelle</i>  | F: CCCTACACCGAGAGGAAGCA   | KP795393.1                      |
|                                               |               | R: GACTCGCCACACTTCTCAGC   |                                 |
|                                               | <i>lzm</i>    | F: ATGATGCGTGTGATCTGCC    | JN416111.1                      |
|                                               |               | R: CATGACGCATCCATCGCTTG   |                                 |
| stress and<br>detoxification-related<br>genes | <i>hsp60</i>  | F: AAAGGCAAGGGCAAGTCGTC   | KP642083.1                      |
|                                               |               | R: GGCCATTTCGTTCTGCATCT   |                                 |
|                                               | <i>hsp70</i>  | F: GGCAAGGCAGCGAAGGTCATC  | KC493625.1                      |
|                                               |               | R: CGGCATTGGTGACAGACTGACG |                                 |
|                                               | <i>hsp90</i>  | F: TCACCAACGACTGGGAGGAT   | EU809924                        |
|                                               |               | R: CAGGAAGAGGAGTGCCCTGA   |                                 |
|                                               | <i>mt</i>     | F: ACCTCTGCCGCTGTACTCCCT  | GU479376.1                      |
|                                               |               | R: GGAAGACGCGTTGGGAAGG    |                                 |
|                                               | <i>cyp2A</i>  | F: ACCGCCGCTTCACCTTAC     | KR262517                        |
|                                               |               | R: CTTGCTTGCCACCATCTGC    |                                 |
|                                               | <i>cyp2B</i>  | F: ACTTGGTCCTCCTCATCTTCG  | KT159166                        |
|                                               |               | R: TCTCCCTCAGCATCCTCTCC   |                                 |
|                                               | <i>cyp4</i>   | F: AAGACTTCGTGGAGGTGTTC   | KX812713                        |
|                                               |               | R: GCACAGCGTTATGTTGGTGAAG |                                 |

---

|                    |                |                                                        |            |
|--------------------|----------------|--------------------------------------------------------|------------|
| Internal reference | <i>β-actin</i> | F: GCATCCACGAGACCACTTACA<br>R: CTCCTGCTTGCTGATCCACATC  | HM053699.1 |
|                    | <i>ube</i>     | F: TTGCGTTCACAACTCGTATCTACC<br>R: GTCCGTGAGGAGGGAACAGA | HQ436509   |

---

## Gene sequences applied in this study

### Sequence No.1 *bax*

ATGGCCAATGGGTCTATTGAATCAAAGGAAGAGGACAGTTTGTGGCCAGCAGATGACT  
CAGCACAGTCGTTGCCCTCTTCCCGAAATCGTCAGGACTCTGGCACTTTAGGTGACCC  
CAGTGACAACTTTTCACAGGTTGGAAGACACCTTCCCCACTCTTACACCCACGTCCA  
CCCTCACCAGTCTCTGTGGCAGAGCTGCAGGAACGTGCCGTTTCAGGATAGCCAAAAC  
AATAATGTTGATGAGAACAGCAATGACCACCATTTTGACCAGTATGCTGCTGCTGTGT  
TGCCTCCACTTACCCTCGTCGGAAGCTTCATCTTACCCTGCATACCCTAATCAAGAGG  
CTTCGCATTACTCATCTCCTATAGAGATGCATCGTCATACCCTCCATACAACAGCAGAG  
AAACTTCACATCCCAGCAGGGAAAGTTCTTCAAGCTTAAGTTGGGAAGCCTCATCACA  
TGATGCCTGGAGAGCCTCACACCCCTCATCTTCCAGTCGAGACCCCTCATCTTTGCACT  
CATACAGGGAAGCTTCACACCAAGAAGCTCAGTCACACCACCATTACGTTCTTCACA  
TTCCACTCAGTATACCTTACACTCAAGCTACCCTTCACACTCTGTTTCATGAGGCTGTCTC  
TGCCTCTGATCAGTCTGTGCGACCCAGGGTGAGGCAACCATCACAGCATCAGAGAGAT  
GAAGCAGACCACGCCATACCTCCCCGGTTACGTCTTGCCCCAAGAAGGGACAGCTTTA  
GCAGCAGCAGTTGCCAGCACAGTGGACTCACCCACCGTAGAAACCGTTCTGAAGGCA  
CGTCACCTGTCAACAGGTACCCACCACTGCCAAATCATAACTGCCCTCCTAAAGAATC  
AGATGGACGACTACCCCAACTACCAGGGTGTTAGGACAGGGAACCAAAACCCCAACAG  
CCCTATGAGATGGCTTCCCCTTGCCCTTGCGTGGGGGCAGATGCAGCCCCCAGCCCCCTC  
AGGACTTGCCCTCCTGCTGAGAATGTTACTCAGGAGGCTCAGGAATTGCTCACCACCTT  
CACCTTAGAGACCCTTCGTAACAACAGGCTGGATGTGCCTCAGTGTATGCAGGCCATG  
CCCAGTTCCAGCAGCCCCCACATGATGCGTGCTGGCCGGGAACCTACGTCTGCTGGCAG  
ATGCCTTTGCAGGGACAGCTGAGCGACGGAAGGTGCGTCTTATGGCAGAGTCAGTGA  
ACCTCAGCTGCATTGAGATGAGTGACTTCTTCCAGCTGTGTGCTGAACTGTTTTATGAC  
GGTATCACACGAGAACGTATTGTGGCATTGTTACCTTCGTGGGTGATGTGGCTGTGCA  
CCAAGTAAGGATGAAGGGAGAGGAAGTATCCATCTGCTAATGAAGTGGTCCCTTAGG  
TACCTGGTGGAGCACGTGTGTCGCTGGGTGCAGGAGGCAGGTGGCTGGGTAAGTGTC  
ACATACAAGGCTAACTACCACATCACAATCTCTCCACATAA

### Sequence No.2 *bcl2* (partial)

ATGGCCGGTCTATCGCTGGAGGGTCTCGGACAACCGGGTGTGGGCGTGAACGGCAGC  
ATGGGCGTGAGGATGAGGAAGTCTTCGGTGCCCATATCTCGCCTCGGTCCCTCGAAA  
TCCCTGCCGGCCACATGCCCCAAAGTCAATCTCCAGAAGCGGTTCCCCGGCCAGACG  
CCGGTTCTCCAACGTGAGCGACGCGGTGACCAGGAAAATTTCTACCACGATAGGCTGG  
CGGAGCGTGAACGTGGAGGCGGTGGTGACACAGGCCAAATGCCTCCTGACGCAGTAC  
ATCAGGTGTCGCCTCAAACGGGCCGGCCTCCTTCACAAGAACTGGGTCTTCAGCGGC  
TCCGATCCGTGGCCAACCTCGCGGGCGGCTGGGAAGTGTGCGAGGTGTTCCCACGCG

Sequence No.3 *cytc1* (partial)

Sequence No.4 *AP-1 (jun)*[illegible]



## AGTAG

### Sequence No.5 *eif2a*

ATGAGGGCTGTGGCGTGTACACAAATGGAGGGATAATATTCTCAGATGGCAAGGCAG  
AAGACAATGAAGACTTGCAGGGAAGAGTAAAGACCTTCATTTTTTCCCAAGATGGGAG  
TAAAATTGCATGGATTAAAGGTGGCCAAGTGCATTTGGCTGAATCACCAGATTGGACA  
AAGATTGGATCATTGAAGCATCCTCGAGCACAAGAAATATGCTTCTCTTCCCAGGGAA  
ATTACTTGGCTGTTTGGGAATCGTATGTCAAAACAACAGACCAGAGTCAAGTCCAACC  
AACTTGAGTGTATATGATGTGTGTGGGAAGAAGTTGCTCAAAGCTTTCTTTCAACAA  
AGTCAAATAAACTGGGAGCCACAATGGACACATGATGAAACTATTTTTGCTCGGAATG  
TCACCAATGAAGTGCATTTTTATAAAGCTGATGACCTTCAAACATTGCTGTAAAGAAG  
ATTCTCCCAAAAGTGCGATCCTTCAGTTTATCGCCATCCACTCAAAACCATCATGTCAC  
CTTTTTTGTGCCAGGTGCAAAAGGGAGTCCAGCTTACGTTTCATCTCTACCGTTATCCAA  
ATTTCCAAGACACTACCAGTGCCTTGGCCAACAAGAGTTTTTTTAAGGCTGACAGTGT  
AACCACCCTCTGGAACAAGCAGTCCACGGCTTGTCTGCTTCTGACAGCTGCTGAGGTT  
GACAAATCAGGCACCTCATACTATGGGGAGCAGATGCTGTTTTACCTGAACATCCAAG  
GGGACTCCACAAGGATAACTTTTACTGCAAGCACCGTCCCATATATACCCCAACATGAA  
AGCCAGCAGCACCATGGGCCAAAGCAAAATCAGGAAATATTCATTCTGTTTGTGGA  
GCCCCAATGGACAAGAGTTCTTTGCTGTCTATGGAACGATGCCGTCCAAAGCAACAAT  
GTTCAACCAGAAGTGTGAAGTTGTGGCAGAGTTTGGTGAGGGAGCCAGAAATACCGT  
CAGTGTGAATCCAGTAGGAAACATTGTACTGGTGGGGGGATTTGGGAACATCTCGCCC  
AGGTATGAGATGTGGGATATTAAATTGAACAAAAAGATTGGTGAAACTGAATGTCCTG  
ACACTACACACCATAGCTGGTCTCCATGTGGCCAATACCTTCTGACGTCCACCTGTTAT  
GCTCGTCTCAAGGTCAATAATGGATACAAGGTGTGGCATTACACTGCTGTCTTGCAGCA  
AGAGACTTCTCATGAAGAACTTTATGAAGCTTCGTGGGTTCCATGCCCAGATGCAGCTC  
AACCCTTTGCTATTTCCACCAAACCTGTTTCTGGAATCTCCTCTTCAACAGCAGTTGCT  
TCAAAACAGAGGTATATCCCTCCTTCCCAAAGAGGAGGAAAAGGCATTGTTGGGGCCA  
CAAATACAGAGAAGAAGTTTTTGTGAGTCAAATGGACAACCCACCAAAGAAGAAGCAC  
CCCAGCAGCTGTCTAAAGCAGCCCTGAAAAACAAAAAAGAGAGAAGCAGCAAAG  
AAAAAACGGGAGGAGGAGGAAAAGATGAAACCAGCAAACAGAGCACGGGATCAGC  
CTCCACAGAACCAGGCATTCAAGTCATGCGGCTCAAATGTTGAATTGACTGGAAATCCT  
GAAAAAGATAAGAAGATAAGAAACATTAAGAAGAACTTAATGCAATTGCAAAGCTTA  
AAGGAGAGCTTGAGAGTGGGAAGACTTTAGAGAAAGATCAACTGGAAAAGATTGCCA  
CAGAGGAAAAGCTGATGAAAGACCTGGAGGACCTGGTCATTTGA

### Sequence No.6 *atf4*

ATGGAGGGGCGAGAGCTCCTTGAGCTGCCCAGTGTAGGGCTGTTTGACAACATGCCAG  
CCTCACAGCCCTCCACACCTCTGGAAGACAGCCTCATGAAGATGGATGAGGAGGAGG  
AGGACTACTGCTTCACCATCAAGCCAGAAGACATGCTTGTACCTCTGTCTGAGCTGCA  
GCCTCCCACACACCCACTCCTCCTCCCCTGGCCTCCACTCCCCCTGCCAGCCCAGTAC  
ACTGTTATTCCAACCTTGTCCCTGCCAACCTCCCCAAGTCCATGCCAGTCCACCTCGA  
ATTCTGCTCCTGCCCCTGCTGCCCAAGTCCAAGCCAGCGCTCCCCTGCCCAAGATCAT  
CATCTGCCGCAAGGTTGGCACGTCTACCCTGAAGACCAAGCCAGTCAAGGTGCACTAC  
CAAGTCATGCCAGTCAAGAAAATGCCACAAGTCACACCTGGCACTCCCTTGGTGAGCC

AGACACCCCTGCCAGTCAAACAAGTCCCACAAATTTCTGTGGCACTCCCTCCTCCAC  
CCACACACCCCTGCCAGCCCCACAGCTGCCCCAGGGAACAGCCTAGGAGGTCAAAC  
GGTTGTCAGGTCCCTTGTAGCAAGTCAGGGCAAGCTTCCAACCACTGGTTCATACATG  
GATGTGCCTCAGGTTACCGTGAGTGCCGAGGAGCTTCCACCATGCGATGCCGAGGAGC  
TGATCAACGAGATGGTACAGATAATTGGCGACAACAACAATGCCAACACCTTCTTCCA  
GGGCCTTGAGGTGGAGGAAGGCATGGAGGAGCTTCTTCTCAAACCTGGAAGCCTCAAA  
CAAAGCCAACCTCTGAGCCTGACTCCCAAGCCTCCCTGTCCGTTCTGTCCCATCTGCG  
TCTCCCAGCAGCTTCGGCTCTGCCTCTCCTCATCCCTCGGAAACCACCTTCTCTGGCTC  
CATATCCTCGCCGGCCCACTCTGAATCCACCTTCCCATCTTCCCCTCTCTCCCTCCCCTC  
CCCCGTCCCTTCTTTGGGCTCCCTCTCCCCAGCACAGTCCACCAGCGACTCTCTCTTCC  
CTCCCGATGAGACGAGCTCCACCGAGGACTGTCTGGAGGATTGGAGCCCCCTGGAGG  
AGACACACTCATACTCTAAATCAACACGCAAGTCAAAATCCTCCCGCAGGACCTCATC  
TGCCAGGAAAGCACCGTACCCAGAGGACCGCAAGGAGCGCAAGAAGGAGCAGAACA  
AGCAGGCGGCGCTGCGATACAGGCAGAAGAAGAAGCAGGAGGAAGATGACCTGTTG  
GGCAAGATTGAGGTGGAGGAGGAGCGTCAGGAGAAGCTCAGGGCCACCTACAAGGG  
TCTGAAGCAAGAATTGGGCTACCTGAAGAAGATCATGCGGGAGATGTTATGGCCAAG  
GGAATGCTCTCAGAGGAGGCACTGAAGAAGGCTGCCTTGGCCAAGAAGACGGCTACG  
AAATAG

Sequence No.7 *atf6*

ATGTCCCCGGCCTCCTCCTCTTTCATCCTCGTCTTGTAACCTCAAATTCCTTCAAGTAT  
GATGGTGATATGACAGCGGAGGAGATGCTGACGCGCACACTCTACCCTAACCTGGTGG  
CGAGCCCCGGGCCTGAGCTGCGGGGGATGGAACCGGAGAGTCTGGTGAAGGAGGAG  
CCGGCCTCTCCGCAACACATCGTGACGTGCCGCCCTCCCCCGACGACACCAAAGAC  
ATCTGGGACCTGCTGTGTGGGGGCGACGTCAAGCCCAACGTCAAGGTGCTGGACACT  
CCCCCAATCACCCACCCAGAGTGAGGCCTCCCCCCCACACAGCCCCCAGCCCCCTT  
CCCCTGTGGCCATGGTGTGGGTCAGCACCATCACCCCTGCAGCAGCACCAACAGAA  
GCCCTTGGTCAGCAGTAGTAGTGGATCTGGCAACCATCTCTCTCAGCCCATCAAAGTC  
GTCACCATCACAAACGCGGAATGGAGGGTCAGGACCTGGGCCAACAAAGGGTGGGCGT  
GTCACCAAAACCATGAAAATTCAGCCCAAGGTGATGAGCCCGTCTTCTGTGCAGACAC  
CCCAGCCACAGGTCATCAGTATTGTCAACTCCTCCTCTGTGCCCAAGCTGACCCTGCCC  
AAGACTGCTGTGACGAGAACCCTCCCAGCAGCCAGCCCCAGAGTAGTGACAGGTGAAG  
ACCCCGTCAGCCAGCCCCCGCCAGCACCTCCCCCATCACAGCCCGCTCCCCCTCCA  
TCATCACTGCAGTCAGCAGTCCAGTATCAGTGACGACAACTGCACCGCCTTCAGCCCC  
CCTGGCCCCCTGGCGCCAGCTCTCACCCCGGGCATGAAGCAGGGCAGCATACCCGAT  
CTCAAGGCATTCAAGAGACAGCAGAGGATGATCAAGAACCGGGAGTCTGCCAGCCTC  
TCCCGGAAGAAGAAGAAGGAGTACCTCACTTCCCTAGAGGCCAGCATCTCCGACCTAC  
AGAAAGAGAACCAGAACTGAAGGAGGAAAATCTTCTGCTGCAGCAGCGCTTGTCAA  
GTCTGGAGACGGAATGTGATTCTCTGCGTCGATCAGCTGGCCGAGCCTCAAACCGAAA  
GACCACTACGGCTCTGTTTGCTCTCATCTTCTGTCTCTCAACCTTGGACCTTGTC  
GGGAATCCTCTTGGGTGGAGAGTCAAAGCTGGACTCTCTCAAGGGGATCCTGAGAGG  
GAGTGATGAGCTGAAAATCCCTCCCAGCTTCTCGCAGCGGTCTCTCCTGTGGTCAAGG  
GATGACGCAGCCGAGGATGGTGGAGCTTCGTCACAGCTAGGCACCAACACCTCGCAC  
ACCTGCCCCATGTACATCAATGCCACGGAGAGTCTGAGGCTGGAACTGAGCTCAGGG

ACTGGTTTGAACACAAGTTCCGACCTTCAAAGACAGACCGCAAGAAAGACGACATCA  
CGGCCGCTGCTGCTCCTGCTTCCCCAAAGACCAAGGAAGCGCGGAAGGGGCTGGCAG  
GGCACACAGGGGAGGCAGTCAAGGGGGTAACATCAGGAAGAACCAGAGAAGCTATC  
AGTGAGGTGTGGAATGCCCTGGCCCTCCCCACCCACCCCCAGCACACCTGTACCACT  
ACATCCACCCTGAGGCCCTGCACGTTGACCCTCCTGCCAGGCCCGAGGAGCAGCACG  
CTGTCCTAGCCTCGGCACCACGCCTGTGCTCCTTCCCTTGAGGCAATCCAGCGCCGTGAT  
GACACTTACTACGTGGTCTCCTTCTCCCCCGACCACCTCCTTGTCCCTGCCACAGCCCG  
TAATGACTCGGCACGCCCCCGCATGTCCCTCCTCATGCCAACTCCACGGCCAATCAACG  
AGTCCCTGGCTCCTCCCAGGGACCACGTGGCTCTCATGCAGATTGACTGTGAGGTGAT  
GCACACCCGCCTTGTACACGTGTCTGAGGAGTTCATTCTCCACACCTGCGTGCTGGT  
GGCAGCAACGCCTCACATCCAACATCACAAGCTCCTCCCGAGACCCCCCACCCTGCTC  
GTGGGGATTCCAGGCGACGGTCAAAGTCAAGACCATCACTGCCCACCCAGTAG

Sequence No.8 *ire1*

ATGAAGACTGGCGCGAGGCCCTTGATGGCGGTGGTAGCGGGGTTAGTTTTGTGGTCCT  
GCCCCCAACCACCGCCACGAGACACAGGGACGCTAATATTAAGGACAAGATCACGTC  
AACTGAAGTACTAGCAGAGAGCGAGGAAGGCACTCTGCTGGTGTCCACTCTTGATGGC  
GTGCTCCATGCCATCACCAAGTCCACGGGAGCCATCAAGTGGACCCTCAATGACGATC  
CAATAATCATCAACCCAACAGATTCTTCACAACCGCCAATACCCAGTTCTTCCCAAAT  
CCCCAAGATGGTTCCCTCTACCGCTACACCATGAGTCGGGGACGTGACCCCTCTCAAGA  
AGCTGCCTTTTACCATTCTCAGCTTGTGGCAAACCTCTCCCTGTCGCTCCAGTGATGGC  
ATATTCTACTTAGGTAAGAAGGTTGACTCTTGGGTTGGCATTGACCCCGTGACTGGAGA  
GAAGCAGCTGGTCCTTGGTGTGGATGGTGTGAACCGCAATTGTCCCAAGCCTTCTCGC  
AACACGGTTTACTTTGGCCGCACTCTGTACAACATCATACTATATGAGGCAGCAACTCA  
GAACAAGTGGAACATCAGCTTCTCTGAATATGCTACCAGTTCCTCATCCACTATAGAAA  
ACTATGACTTGGTGCCTACACTTCTACGGGTGAAGGCTCCATCCTCACCGTGGATCAG  
CGCACCGGCTCCCTGCTGTGGACCCTGGAGCTGCCCTCCCCCTGGTGGCCATGTACC  
TGCTGGGGCCTGATGGTGGACTGCTCAGTGTTCCCTTGACCACAGTGGCTCCACAGAC  
ACTGGAACACTTCACTCGGGAGTTCATGCACCTCACTCACCACAGCTCGGATGGCTCA  
GAGGGCCTGCTCATCAAAAAGTTAAGCCCCACCATCTACATAGGTGAGTGCAGCTCAG  
GCCTGTATGCTGTACCAGCGCTGGTGGACACCAACACGGCCACAATTTTCCACCGAGG  
GTCACAGTTGCTGCTGGGGGGCCCTCCAGGTTCTCGAGGAACCATCAAGTCATCACAT  
TCCCAAGCTGCCAGTGATGCAGAGAAAGAAAAGGAGCCTGAAGTTCTCCTGTTGGGT  
TACTATGAAATACCGGAGAGTGCACAGACGGAGCTGCTCAAGGCCAAAACGGGGGAG  
GTGACTGAGGGGAATGAGGAGGTGGTGCCTGCTGGGCATCACTCACGCCAAGAACAAC  
AGTCGGGCCTTGGAGGGGGAGGGACGGGGCGCCAGCAGGGACCAGCAGGACCTTGT  
GGCTGTTGTCTGGGATGGAATGGAGCAAATCAAGATGATGAACATGAGTTTTGTGACC  
TCTCAGAACATGTTTGTGTGGCTGGGGACCATTGGGCGCCTGGTGTGTGTCTGGCTGC  
TGGACAACTACATGAACTTACTTGTGGTCACTCTTGCTTTTGGATTTTATGCTATTTTAA  
TTATTTTGTATAAGCAGGCGAAAGAATATGCACGGCTCAGTCGAGAAGTGTCTCACG  
GCGGCAGGGCTCCCAGGGCTCAACTGGTTCAGGCTCATCAAGCAGCGTCACAGCTGT  
GGCGGAGGAGCTGAATGACGGCACCATTAGTGTGGGAAAGATCATTTTAAATCCACAA  
AAGCTGCTTGGAAAGGGCTGTGATGGCACCTTTGTTTTTCAGAGGCAGTTTTGATGGCC  
GGTCAGTGGCAGTAAAGCGAGTGCTCCCGGACTGCTTCTCTATTGCTGACCGAGAAGT

TGACCTGCTGCGGGAGAGTGACCAGCACCCCAACGTCATCAGATACTTCTGTACAGAG  
CAGTGTCTGTCAGTTTTCGTTATATTGCCCTGGAGCTGTGCGGCGCCACTCTAGAGGACTT  
CATACGGGGAAAATTCAAGGCAGACATCAGTATCCTGAGCATCCTTCATCAGGCCACCT  
CAGGGCTTCATCATCTCCATCAGCTGGATATTGTTACCGTGACATCAAGCCTCACAAT  
GTGCTTCTTTCACTGCCAAACAACAAGGGACAAGTCAGGGCAATGTTGTCTGACTTTG  
GGTTGTGTAAAAGGCTGGAGACAGGCCACATGTCCTTCTCCAGGAGGTCTGGGGTGA  
CCGGCACGGAGGGGTGGATTGCCCCAGAGATGATGCTCAACACTTCTCGGCCAACATT  
CAAGGTAGACATATTTTCTCTTGTTGTGTGTACTACTACATGCTCACACAAGGAAAGC  
ACCCGTTTGGTTCTGTCCTCGACCGCAATCAAATATCATATCTGGAAAATTCAACTG  
GATGAGTTTGACAAAGAAAAGGATGTGAATTGCATCACCTGATTGAGAGGATGGTGA  
GCAGCAAGCCGTCGGAGCGGCCCTCAACATCTGCCATACTCAAGCACCCCTTCTACTG  
GAACCCAGAGAAGGTTCTTGGGTTCTTCCAGGATGTGAGTGACCGTATTGAGAAGGAG  
AACGGAGACACCATGGTTATGATGAGTCTGGAGTGGGGAGGAGCGCAGGTGGTGCAG  
GAAGACTGGCGGCAGCACATGCACCCCGTCATTGCTGAAGACCTGCGCAGGTTTCAGG  
GACTACAAAGGACGCTCCGTGAGGGACCTCCTGCGAGCACTCAGGAACAAGCGGAAC  
CACTACCGGGAGCTGAAGGAAGAGGCACGAATGGTGTGTTGGCTCCATCCAGACGAG  
TTTGTGGCCTATTGGACCTTGAGGTTTCCCAGGTTGCTGCTACACACCTGGTGTGCCAT  
GCAGTGTGTGAAGACGGAGGTCATATTCCAGAAGTACTATGACAAGAAGTTCAACTTT  
GGTCCGGACATAATTCCTGAGGCTCGTCAGTGTGCTCCAACCAGCACTCCCTGGCAGC  
TGAGTGGCAACAGCCGAGTAGGGTCTACCTCCTCGGAGAGTCCATACCAGCGAGGAG  
CAAACAAAACCTGCAAGGAGAAAACAGGAAGTAAATCCTGTTTGGATTATTCGTAAATC  
ACCCATAACTTCTGAACCCAAATATCGAATACCAATGCTAAGGAACATGGATGCTCCTT  
GGAGGAGACCATTTGTGGAATCAAGCACAAAAGAAGTGAATCAGCATGAGACCGAAA  
ATGATCCCCTACAGGGACAAGAAGCAGACATTTTAGGAAAAGAATTTAAGCTAGAAAA  
TGCACTAGATATTGAGGAGTCCTCAATATCACTAGTTAGTGAGGCTCCAGAAGCAGAA  
GCCTCTGTAGACCCAGAGAAGGTGAACCAAGAGTCCTCTCAACCACCTTGTGATGTGC  
AGGATCAAGGCGAGACGAAATTCATCATCCCTCCGAGGGTTCTGAAGGTGTAGATAA  
AGAAGGTCCAGAAGAGCAGCCTGAGAATGGCAGGGAGGCATCCCGTCTGTGTATCAG  
GGAGTCATCAAACGCCCAAGACAAGTCATCTAGTAAGCCAGACAGTGTTGTAAAGACC  
GGAAAAGTCGCAGGGAAGAAGAAAAAATCTAAGAAATTACCTCTTGAGGAGACAAAC  
AAATAG

Sequence No.9 *tfeb* (partial)

CAGGTGGAGGATGTCATCGACGAAATCCTTAGCCTGGAGGAGGGCTACGAGGCTGAC  
ACTCGCAAGACCCCGGAGCAGCTGTGTGGCGTCCAGCCCGCGGCCAACAAACAGTGTG  
CCTGACCCACTATGCAATATACTGGGCCTCAACAGCTACATGGGCAAGACGTCCACCTC  
GTGTCCTCCTGACGTGCCCCAGGTGAAGAGCGAGCCGCCCGTCAACGACCAGCAGCT  
GGTGGCCTACATGAAGGACAGGCAGAAGAAGGACAATCATAATATGATTGAGCGAAGA  
CGAAGGTTCAACATCAACGATCGCATCAAAGAGCTGGCCACTCTCCTCCCAAAGAGCA  
ACGAACCGTACTTTGAACTCGTGCGAGACCTTCGCCACAACAAAGGTCAGATCCTCAA  
GGCCTCCGTGGACTACATTCGGCGCCTCAAGCTGGACGCTGATGCCAACAAGGAAGC  
GGAGGCCAAGCGTCGCGCCCTTGAGCAGCAGAACAGGCAGCTCCACCTTAGAATACA  
GGAGCTGGAGGGAAGGCTGCGTTCAAATGGCATCAAGGTGGACGAGACCAACATAGA  
TAAGAGTTTGCTCCTGTCAACGATCATTAAGACGGAGATG

Sequence No.10 *p62*

ATGCCGGAGGAGGCCAATATGAGTTTCAAGGTGTATCTGGACCTGGGTGGCGGCCGGC  
AGGAGGTGCGGCGCTTTGCCCTGCCGGAGACTGTGGCCACCAACTACTCGGTGCTGA  
GGGAGAAGGTCTGCAGTATCTTTGGCCTAGCGAACCAAGATGCCGTCTCTCATGGAA  
GGAATCCGAGGGTGATGCCATTGTCATCTCCACCGACGACGAAGTATGGAGGCCGTA  
GCAGACAGCCTGAGCAACCAGAATGCCAGTTGGTACGAATCAACGTGTCTGGAGAGC  
AGCGGCCGCCAGAGCCTGGCACCGGCGGACGTCCAGGGAACCAGGTAGGAGACATC  
CATCTTGGCGTGACCTGCGATGGCTGCAGTGGTGTCTGTCCAGGGCTTCCGCTACCGCT  
GCGTTGCCTGCCCCGACTACGACCTGTGCGGCGCCTGCGAGACCAAGGGAATGCATAA  
GGAGCACAAGATGATCCGCCTGCCAAGCCACAAGACCCTGGAGCTCCAAAGTTCTT  
CTGGAAGGAGAGAGAGGAAGGGCCGGGCCAGTATTCAACTCACTTTGGGATGCAAGG  
CGGTGATGCTGGTGGAGGTACTTTCCAGTCCAGCTCCTTCAGTGGCTGTGGTGTCTGCT  
GGTCTTGGGACTGGTGGAGGGGCTTGGTTTGGCTTTGGCGGTCCACGTGGGCGCTGCC  
ACAGGCGGGGGCATGGAGGTGGTGGTCTGGGGCCGTGGAGCCTGGCCAGGGTGGTGG  
GGGCGAGGCTGGTCTGGGAAGAACTGGGCTGGCTGCGGTACAGGGGCAGACCATGGGC  
TCAGACTCTGGATGTCAGCAACAGCAGCAGCAGCAGTCATCATCTGAGCAGCCCCAGC  
AACAAACAGTCCCAGCAGTCCCAGCAGCAACAGTCCCAGCAACAACAGAGTAATGACA  
AGAGCCCCAAGGATGAGAGTGGGTGCCCTTGGCTGAATGCGGAGGGTTCTGCTTGCC  
CCTTCATGGGTGAGGACACTGGTGTACCAACCCCGGAGCAGGTACAGCAGATGGCAC  
AGCAGGCTGCTCATCAGGCCGCCAGCAGGCCACCCTTTGCCACGCACTACGCCTC  
CGACCATCTCGCCAATGTCATGCGTGGAATCTGGACAGCTTGGTCTGGCCAGCAGGGA  
CCGAACGCCACCACATCAACCTCCTCCTCCTCCTCCTCCAGCTCCTCCTCCTCCACTC  
TGCCAGTGCCAGCCAGGACGGCCCCAAGCAGGGTACAGCAGAGGAGCAGAAGAGCG  
AGCAGGGAGGGCAGTTTGTACAGGGAGGAGTACCTGAGGAACGTTGGGGAGACGGTT  
GCCAACATGCTGGACCTCTCGGCATTGACGTGGAGGTGGCCGTGGAGCACAATGGG  
ATTCGCCAGCGCTGCAGCCTCGGGGAAAACGCACCCACCTCACAGAGCAACGCCTCA  
CCAACCCCAACCAGCCCCACCAAGCAACCAGAGTCCACACCTTCTCCTTGGCCTCCG  
GAAGCGTGAACATGGAGGTGCAGACCGAGGAACCTGCAGAACCACAGACGCCAAGT  
ACCAAGGATGTCGAGGCTATGGATGTCGCAAGCCCAGCACCCAGCCCCAGTTAGCCAGG  
TCGCAGGGGGGAGGAGGAGGTCACACTGGGTCCCCTGAACCCGAGGACTGGATGC  
TAGTGAATCAGGAGACGAGTGAGCCTGCCTCAGCCTCCGGGGTACAGACCCAAGACCC  
CACCAAATGATAAGCCAGTGTCTACCCAAGTCTGAAGGAGCTCACGCCTCATCTGA  
CCCCAAGATCCAGCAGTCCTTGGAGCAGATGTCAGCGATGGGCTACAGCAACGAGGG  
AGGCTGGCTGACCAACCTGCTGGAGATGAAGCAGGGAGACATCAACCAAGTCCTGGA  
CCTCCTGCAGCCGGTCAATAAGTAA

Sequence No.11 *lc3c*

ATGAGGCCCCGACCACGTGTGATGAGGTGCAGCTGTGTGTTCTGTGCTAAAGCCCCGG  
ACAGCAGTACAAGCATTAGTAAGGACTGCGAGACTGCTTATTTCCCCTACCTCGGCGCT  
GGCATTGCAGGACCCGTAGTGGTGCCAAAACCTTCAAGCAGATGTACAGTTACACCT  
CCAGACAACAGGAAGTGGCGAATATCAGAAGTAAATTCCCGAACAAAATTCCCGTGGT  
GGTGGAGAGGTACGCGAAGGAGACCAGTTGCCTATCCTCGACAAGACCAAGTTTCT  
GGTGCCTCAGGAGCTCACCATGTCCCAGTTCGTCACCATCTCAGGAACAGAATGCAG

CTCCAATCCACCATGAGTTTCTACCTCCTCGTCAACAACCGCTCGCTGGTCTCCCTCTC  
GCGGCCGCTCTCCGAGGTGTACCGCGAGTGTAGGGACGATGACGGCTTCCTCTACGTC  
ACCTACGCCAGCCAGGAGGTCTTCGGCTGAGGGCAGGACAGATGAGGTCCGGTCAAG  
GTGCTCAAGCTTTGTACTGCTGTGATAG

Sequence No.12 *lc3a*

ATGAATGCACAGGTTAAGCCCTTCAGGGAGCGACGGAGCTTTGCCCAGAGGCAGCGT  
GACGTGGAGCAGATCCGCGAGCAGCACCCCAACAAGGTCCCGGTGATCATCGAGCGT  
TACCCCGGCGAGCGCCACCTCCCCTGCTGGACAAGACCAAGTTCCTGGTGCCTGACC  
ACGTACAGATGGGAGAACTGGTCAAGATTATTGCGCCGTCGCCTCCAGCTGCACCCGAC  
ACAGGCTTTCTTCCTTCTGATCAACCAACGCTCTCTTGCCAATGTGTCCAGCACCCCTCG  
CCCAGGTTTACGAGCACCAACCACGAGGACGGCTTCCTCTACATGGTGTATGCGTC  
CCAGGAGGTGTTTGGATAA

Sequence No.13 *lamp* (partial)

ATCAAGTACAGCGTGAATGATGAAAATAATGTGACCTGCATTATTGTAGCAGGGGAAAT  
ATTTTCAATGTCAACTACACACTCCGTGACAATACTGCAGTCAAGTCTGTGTTTG  
TGCCATCCATTGGTGTACAGTTGATGGGTCTTGTAATACTGAAGGCAATCAGTTC  
ATCTCATTCTCTTGGGACAAAAACAACCTCTGTCCAGATGAACTTTGAAATTGGAGACA  
AGGATGCCTGGATGTTTACAACCCTCACAGCCTCCCTGCTCATGGATGATGACTCATTT  
GCAAATGCTACAGATGCTGGCAAGACACTTGACCTGACAGTAGATTACAACCTTTAGCC  
CTGGTGAAGTGAGTGTCAACCACAGCTTCATCTGCCGCTCCTCCATTACCACCAACAAT  
GTGACTGCCACCATTTGAAAAGGATACTTACAGCTCTCCAGTCACATCTACCCTGAAGA  
ACATCCAAATGCAGGCCTTCAACAAGATAAAGGGTCAGGAAAACCTTGCAGAGTCTGT  
ACACTGCACTGCCGACAACACCTCGGATGTGGTACCCATTGCTGTTGGCTGTGCTCTG  
GCTGGCCTGGTAGTGATTGTGCTCATTGCCTATCTGGTAGGTTCGTCGAAAAGGTCGGG  
AGCATACCAGTCGGTG
